# Supplementary material for: HiCBin: binning metagenomic contigs and recovering metagenome-assembled genomes using Hi-C contact maps
Source: PubMed Central journal article supplement (PMC8883645; doi:10.1186/s13059-022-02626-w), 2022-02-28
Supplement: 13059_2022_2626_MOESM1_ESM.pdf [file 13059_2022_2626_MOESM1_ESM.pdf]

## Evaluation criteria of the clustering results

### The Fowlkes-Mallows score

The Fowlkes-Mallows score (F-score) is defined as the geometric mean of the precision and recall, i.e.,

$$\text{FM} = \sqrt{\frac{TP}{TP + FP} \cdot \frac{TP}{TP + FN}}, \quad (\text{S1})$$

where  $TP$  is the number of true positives,  $FP$  is the number of false positives, and  $FN$  is the number of false negatives.

### The Adjusted Rand Index

The rand index (RI) is defined as the percentage of correct decisions made by the clustering algorithm, i.e.,

$$\text{RI} = \frac{TP + TN}{TP + TN + FP + FN}, \quad (\text{S2})$$

where  $TP$  is the number of true positives,  $TN$  is the number of true negatives,  $FP$  is the number of false positives, and  $FN$  is the number of false negatives.

Then, the Adjusted Rand Index (ARI) can be defined as

$$\text{ARI} = \frac{\text{RI} - \mathbb{E}(\text{RI})}{\max(\text{RI}) - \mathbb{E}(\text{RI})}, \quad (\text{S3})$$

where  $\mathbb{E}(\text{RI})$  denotes the Expected Rand Index.

### The Normalized Mutual Information

Let  $U$  and  $V$  denote the sets of true class labels and predicted cluster labels, respectively. Define the entropy of a label set  $S$  as

$$H(S) = - \sum_{i=1}^{|S|} P(i) \log(P(i)), \quad (\text{S4})$$

where  $P(i) = |S_i|/N$  is the probability of an object in class  $S_i$ .

The mutual information (MI) between  $U$  and  $V$  is calculated by:

$$\text{MI}(U, V) = \sum_{i=1}^{|U|} \sum_{j=1}^{|V|} P(i, j) \log\left(\frac{P(i, j)}{P(i) \times P'(j)}\right), \quad (\text{S5})$$

where  $P(i, j) = |U_i \cap V_j|/N$ ,  $P(i) = |U_i|/N$ , and  $P'(j) = |V_j|/N$ .

Then, the Normalized Mutual Information (NMI) is defined as

$$\text{NMI}(U, V) = \frac{2 \times \text{MI}(U, V)}{H(U) + H(V)}. \quad (\text{S6})$$

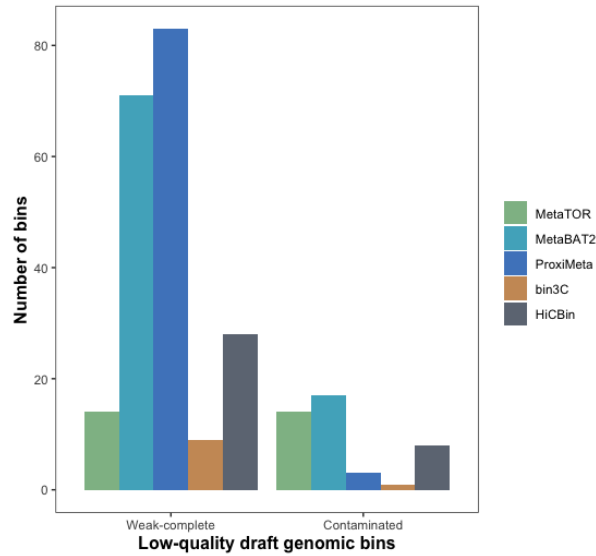

Fig S1: Comparison of low-quality draft genomic bins retrieved by different binning pipelines on the human gut dataset. MetaBAT2 created 71 weak-complete and 17 contaminated bins; MetaTOR generated 14 weak-complete and 14 contaminated bins; ProxiMeta recovered 83 weak-complete and 3 contaminated bins; bin3C constructed 9 weak-complete and 1 contaminated bins; HiCBin retrieved 28 weak-complete and 8 contaminated bins.

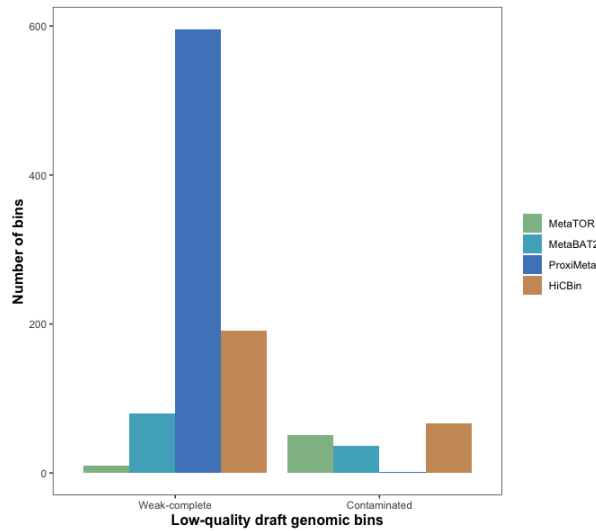

Fig S2: Comparison of low-quality draft genomic bins retrieved by different binning pipelines on the wastewater dataset. MetaBAT2 created 80 weak-complete and 36 contaminated bins; MetaTOR generated 10 weak-complete and 51 contaminated bins; ProxiMeta constructed 596 weak-complete and 1 contaminated bins; HiCBin retrieved 191 weak-complete and 67 contaminated bins.

Table S1: Reference genomes of the species list in the metagenomic yeast sample.

| Genus                  | Species                           | Strain in sample | Reference strain |
|------------------------|-----------------------------------|------------------|------------------|
| <i>Saccharomyces</i>   | <i>cerevisiae</i>                 | FY4H             | FY               |
| <i>Saccharomyces</i>   | <i>cerevisiae</i>                 | CEN.PK           | CEN.PK           |
| <i>Saccharomyces</i>   | <i>cerevisiae</i>                 | RM11-1A          | RM11-1A          |
| <i>Saccharomyces</i>   | <i>cerevisiae</i>                 | SK1              | SK1              |
| <i>Saccharomyces</i>   | <i>paradoxus</i>                  | YDG613           |                  |
| <i>Saccharomyces</i>   | <i>mikatae</i>                    | FM356            | IFO 1815         |
| <i>Saccharomyces</i>   | <i>kudriavzevii</i>               | FM527            | IFO 1802         |
| <i>Saccharomyces</i>   | <i>bayanus</i> var. <i>uvarum</i> | YZB5-113         | CBS 7001         |
| <i>Naumovozyma</i>     | <i>castellii</i>                  | 4310             | NRRL Y-12630     |
| <i>Lachancea</i>       | <i>waltii</i>                     | Kwaltii ura3     | NRRL Y-8285      |
| <i>Lachancea</i>       | <i>kluyveri</i>                   | FM628            | CBS 3082         |
| <i>Kluyveromyces</i>   | <i>lactis</i>                     | MW98-8C          | NRRL Y-1140      |
| <i>Kluyveromyces</i>   | <i>wickerhamii</i>                | Y-8286           | UCD 54-210       |
| <i>Ashbya</i>          | <i>gossypii</i>                   | WT               | ATCC 10895       |
| <i>Scheffersomyces</i> | <i>stipitis</i>                   | Y-11545          | CBS 6054         |
| <i>Pichia</i>          | <i>pastoris</i>                   | JC308            | GS115            |
